# Supplementary material for: A Consistency Model for Identifying the Effects of n-3 and n-6 Fatty Acids on Lipoproteins in Dialysis Patients
Source: Nutrients. 2022 Mar 16;14(6):1250. doi: 10.3390/nu14061250 (PMC8954007; doi:10.3390/nu14061250)

# Nutrients

---

## **A consistency model for identifying the effects of n-3 and n-6 fatty acids on lipoproteins in dialysis patients**

### **(Supplementary Files)**

---

#### **Table of contents**

**File S1.** Search strategy

**File S2.** Quality assessment

**File S3.** Inconsistency test for network meta-analysis of low density lipoprotein

**File S4.** Inconsistency test for network meta-analysis of high density lipoprotein

**File S5.** Mean path length in network meta-analysis of LDL/HDL ratio.

**Primary search strategy:**

- #1. dialysis[ti]
- #2. hemodialysis[ti]
- #3. #1 AND #2
- #4. omega 3
- #5. omega3
- #6. omega-3 fatty acids
- #7. omega-3 fatty acid
- #8. omega3 fatty acids
- #9. omega3 fatty acid
- #10. docosahexaenoic
- #11. dha
- #12. eicosapentaenoic
- #13. epa
- #14. polyunsaturated
- #15. polyunsaturated fatty acids
- #16. polyunsaturated fatty acid
- #17. LCPUFA\*
- #18. PUFA\*
- #19. ω-3
- #20. ω3
- #21. n3 fatty acid
- #22. n3 fatty acids
- #23. n-3 fatty acid
- #24. n-3 fatty acids
- #25. omega-6 fatty acids
- #26. omega-6 fatty acid
- #27. omega6 fatty acids
- #28. omega6 fatty acid
- #29. #4 OR #5 OR #6 OR #7 OR #8 OR #9 OR #10 OR #11 OR #12 OR #13 OR #14 OR  
#15 OR #16 OR #17 OR #18 OR #19 OR #20 OR #21 OR #22 OR #23 OR #24 OR  
#25 OR #26 OR #27 OR #28
- #30. #3 AND #29

# File S2

## Quality assessment

| Study           | 1       | 2       | 3       | 4       | 5       | 6       | 7    |
|-----------------|---------|---------|---------|---------|---------|---------|------|
| An              | Low     | Low     | High    | High    | Low     | Low     | Low  |
| Asemi           | Low     | Low     | Low     | Low     | Low     | Low     | High |
| Ateya           | Unclear | High    | Low     | Low     | Low     | Low     | High |
| Bowden          | Low     | Low     | Unclear | Unclear | Low     | Low     | High |
| Daud            | Unclear | High    | Low     | Low     | Low     | Unclear | High |
| de Mattos       | Low     | Low     | Low     | Low     | Low     | Unclear | High |
| Donnely         | Unclear | High    | Low     | Low     | Unclear | Unclear | High |
| Ewers           | Low     | Low     | High    | Low     | Low     | High    | High |
| Gharekhani      | Low     | Low     | Low     | Low     | Low     | Unclear | Low  |
| Jabbari         | Low     | High    | High    | High    | Low     | High    | Low  |
| Kajbaf          | Unclear | High    | Low     | Low     | Low     | High    | Low  |
| Khajehdehi      | Unclear | High    | High    | High    | Low     | Unclear | Low  |
| Khalatbari      | Unclear | High    | High    | High    | Low     | High    | Low  |
| Khorsroshahi    | Unclear | High    | High    | High    | Low     | Low     | High |
| Kooshki         | Unclear | High    | Low     | Low     | Low     | Low     | Low  |
| Lee             | Low     | Unclear | Unclear | Low     | Low     | Unclear | Low  |
| Lemos           | Unclear | High    | Low     | Low     | Low     | High    | Low  |
| Mirfatahi       | Low     | Unclear | Unclear | Low     | Low     | Unclear | Low  |
| Moeinzadeh      | Unclear | High    | Low     | Low     | Low     | Low     | Low  |
| Naini           | Unclear | High    | Unclear | Unclear | Low     | Low     | Low  |
| Omrani          | Low     | Low     | Low     | Low     | Low     | Low     | Low  |
| Rantanen        | Low     | Low     | Low     | Low     | Low     | Low     | Low  |
| Saifullah       | Low     | Low     | Low     | Low     | Low     | Unclear | Low  |
| Ruperto         | Low     | Low     | Unclear | Unclear | Low     | Low     | Low  |
| Sorensen        | Low     | Low     | Low     | Low     | Low     | Low     | Low  |
| Svensson (2007) | Low     | Low     | Low     | Low     | Low     | High    | Low  |
| Svensson (2008) | Low     | Low     | Low     | Low     | Low     | High    | Low  |
| Taziki          | Unclear | High    | High    | Low     | Low     | Low     | High |

1. randomization; 2. allocation concealment; 3. blinding of participant and personnel; 4. blinding to outcome assessment; 5. selecting reports; 6. incomplete outcome data, 7. other source of bias.

Q statistic to assess consistency under the assumption of a full design-by-treatment interaction random effects model

Q df p-value tau.within tau2.within  
Between designs 0.49 4 0.9749 0.5984 0.3581

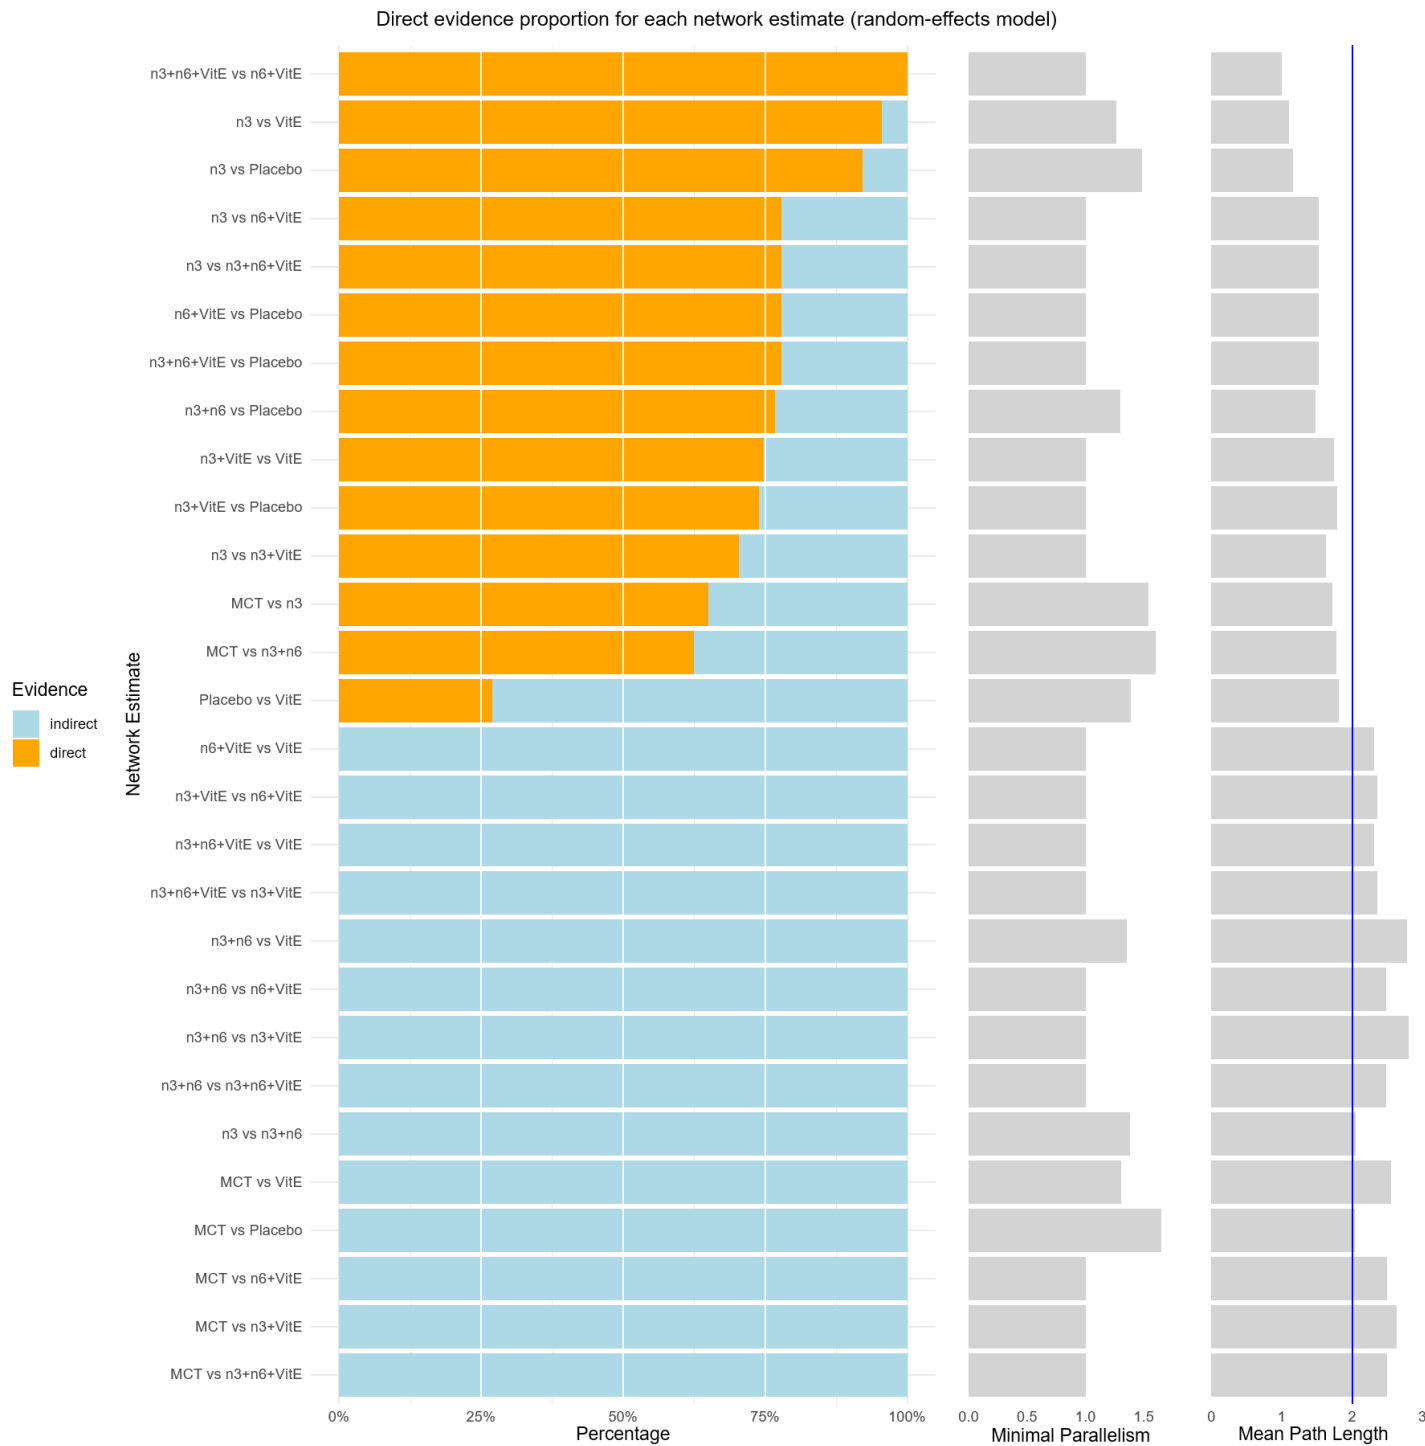

File S4

Inconsistency test for network meta-analysis of high density lipoprotein

Q statistic to assess consistency under the assumption of a full design-by-treatment interaction random effects model

Q df p-value tau.within tau2.within

Between designs 20.68 4 0.0004 0.4407 0.1942

Design-specific decomposition of within-designs Q statistic

| Design           | Q     | df | p-value  |
|------------------|-------|----|----------|
| n3 vs VitE       | 8.14  | 5  | 0.1485   |
| Placebo vs n3    | 7.43  | 3  | 0.0595   |
| Placebo vs n3+n6 | 18.50 | 1  | < 0.0001 |

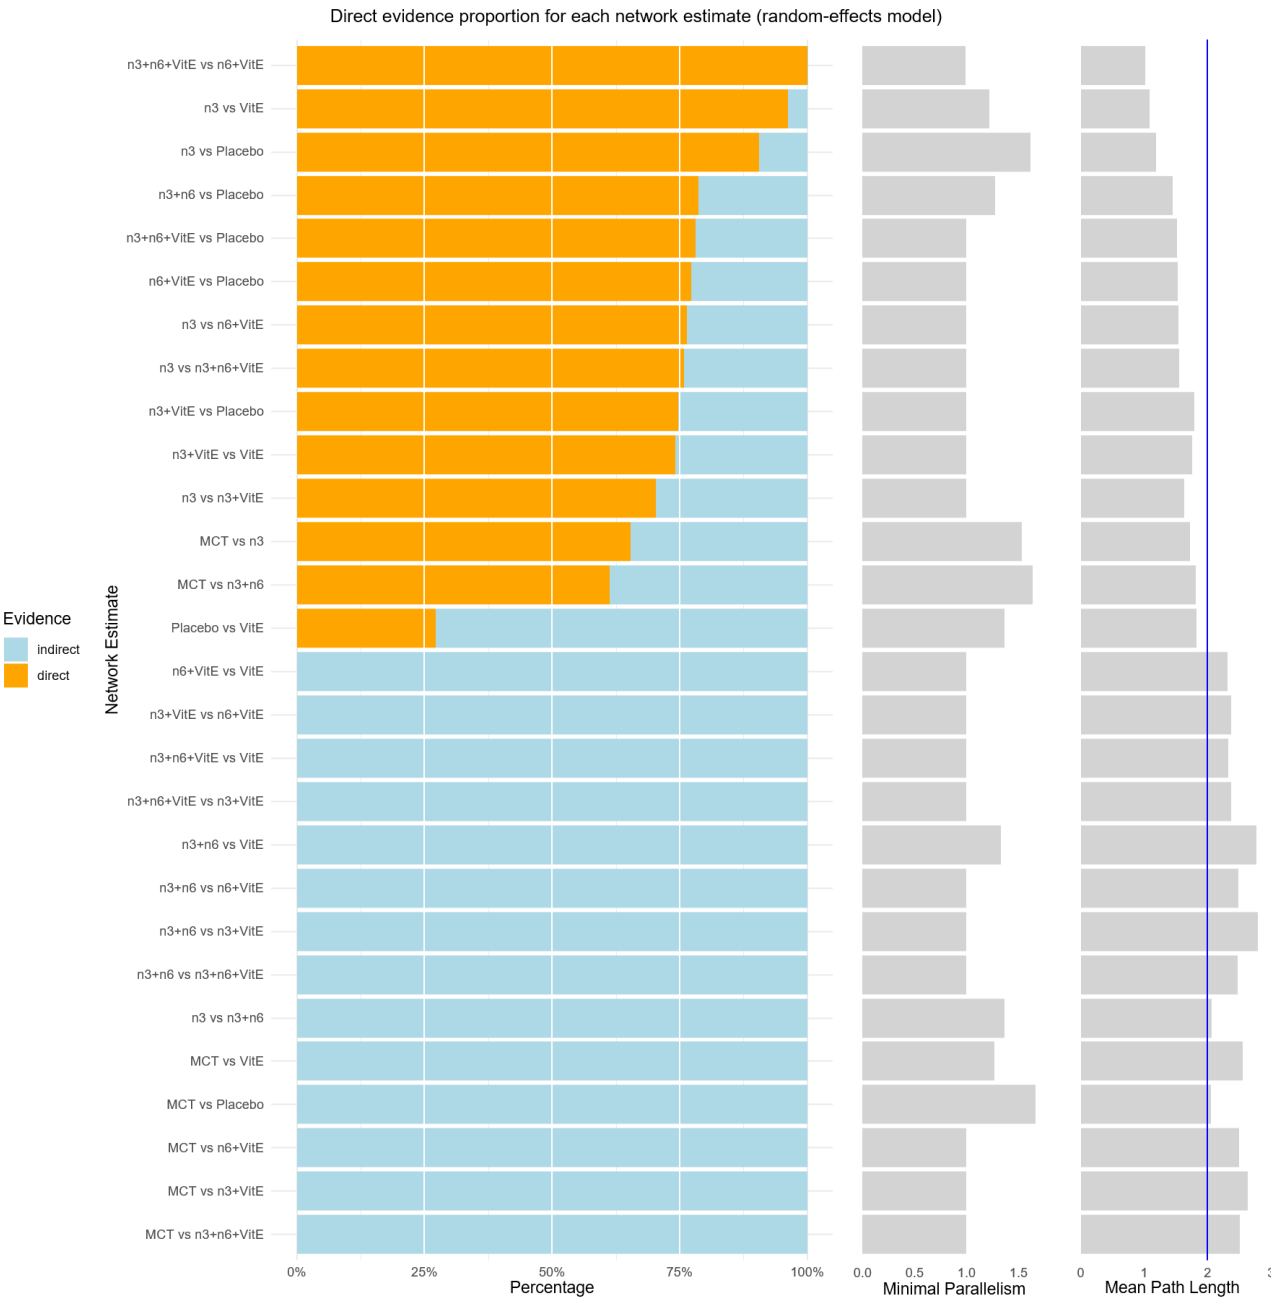

File S5

Mean path length in network meta-analysis of LDL/HDL ratio

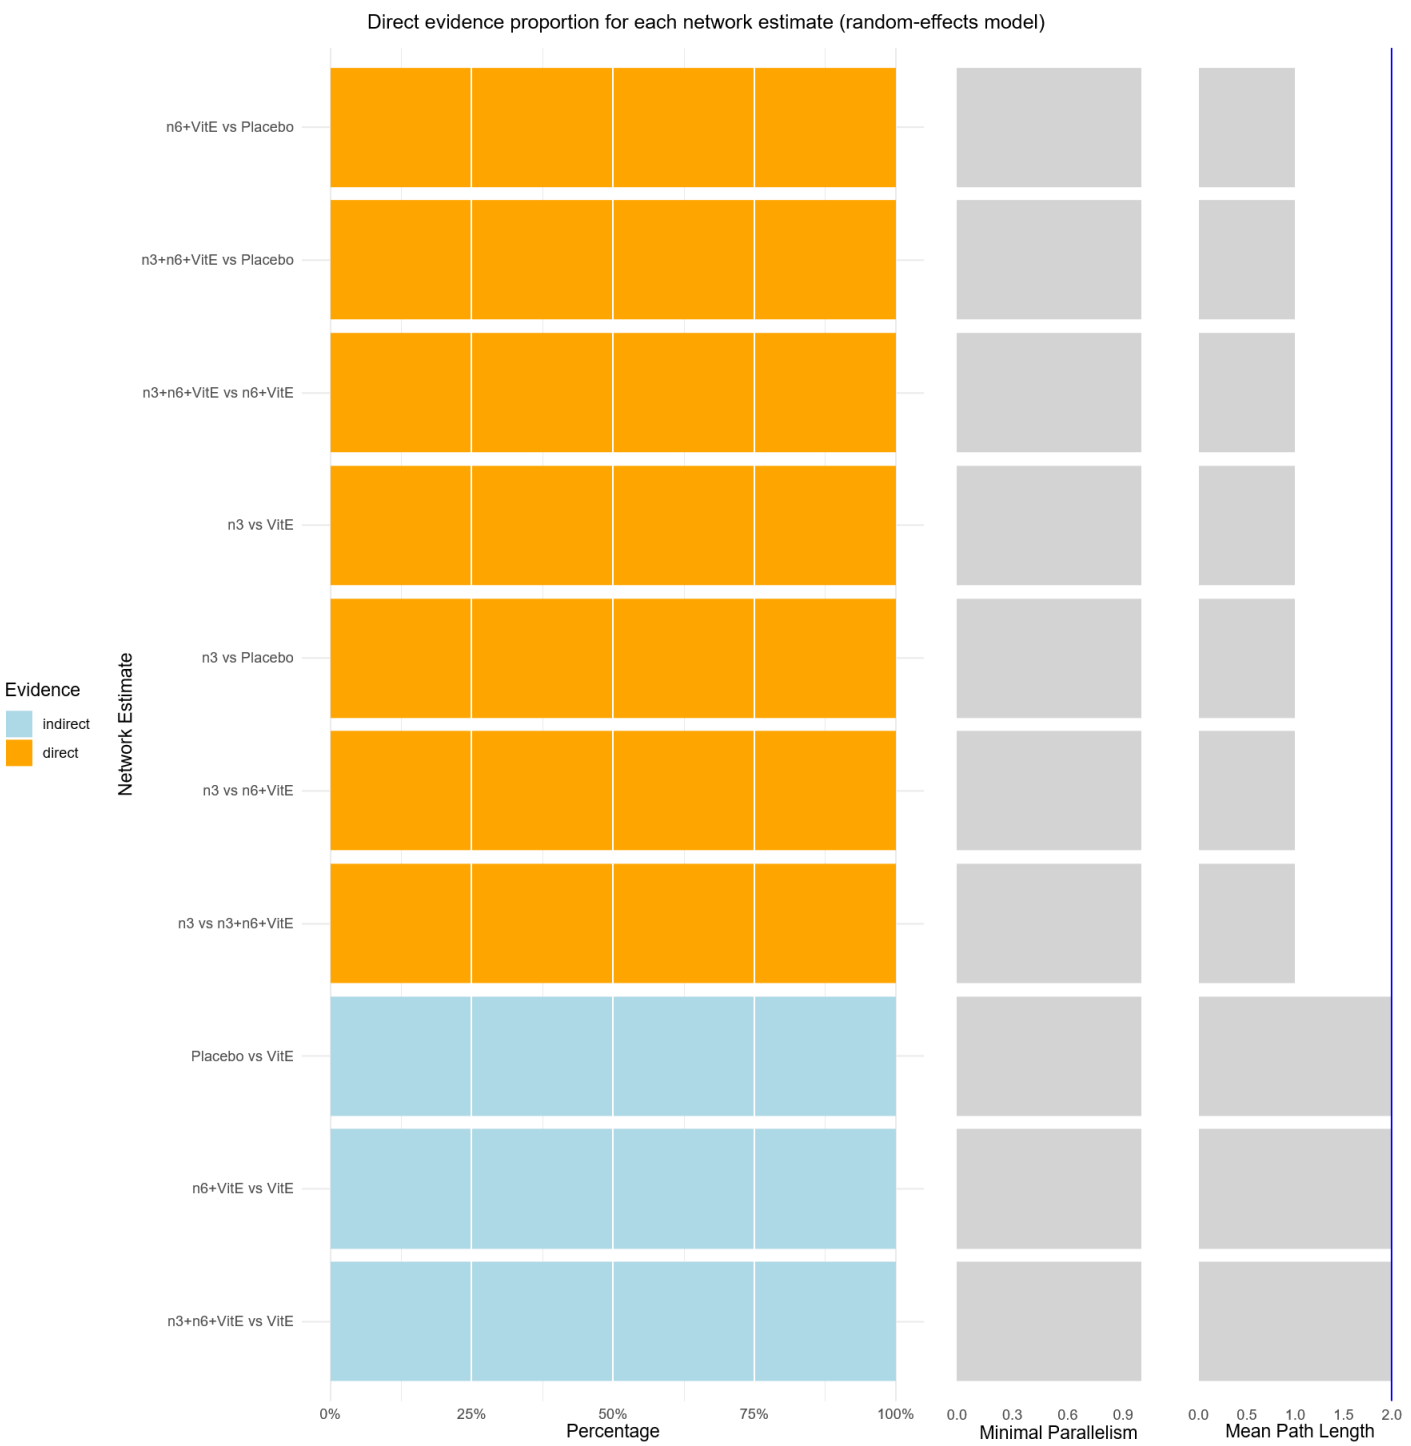

Supplement: Supplementary file 1 [file nutrients-14-01250-s001.zip › nutrients-1606633-supplementary.pdf]
